# Supplementary material for: Spatiotemporal Dynamic Simulation of Acute Perfusion/Diffusion Ischemic Stroke Lesions Evolution: A Pilot Study Derived from Longitudinal MR Patient Data
Source: Comput Math Methods Med. 2013 Jun 18;2013:283593. doi: 10.1155/2013/283593 (PMC3703431; doi:10.1155/2013/283593)
Supplement: Supplementary file 1 — These videos show the diffusion and perfusion lesions as they deform in space and time and visualize the different expanding areas in both lesions. Video 1 displays the estimated spatiotemporal evolution scenario of MTT lesion (in red) and DWI lesion (in blue) from acute to subacute timepoints (video 1). Videos 2 and 3 are dynamic translations of Figure 5 (see manuscript): in video 2 you can see the “lighting up” process of successively highly expanding DWI regions along the evolution process, all visualized on the baseline surface at the first acquisition timepoint t1; and in video 3 you can see consecutively highly expanding MTT regions “lighting up” from acute to subacute stages, all mapped back into the baseline MTT lesion surface acquired at timepoint t1. [file 283593.f1.zip]

Archive with 3 entries (3 files):
- video 1.mov
- video 2.mov
- video 3.mov
